# Supplementary material
Source: HighWire-hosted journal article supplement (https://bmjopen.bmj.com/content/12/7/e059519)
Supplement: inline-supplementary-material-1 [file inline-supplementary-material-1.pdf]

**Supplementary Table 1.** Search strategy used in the systematic review

| <b>Medline database – Search strategy</b> |          |                                                            |         |
|-------------------------------------------|----------|------------------------------------------------------------|---------|
| #                                         | Database | Search term                                                | Results |
| 1                                         | Medline  | exp "ABORTION, HABITUAL"/                                  | 8085    |
| 2                                         | Medline  | ("recurrent miscarriage*").ti,ab                           | 2070    |
| 3                                         | Medline  | (1 OR 2)                                                   | 8848    |
| 4                                         | Medline  | exp THROMBOPHILIA/                                         | 24961   |
| 5                                         | Medline  | ("acquired thrombophilia").ti,ab                           | 317     |
| 6                                         | Medline  | *"PROTEIN C DEFICIENCY"/                                   | 979     |
| 7                                         | Medline  | *"PROTEIN S DEFICIENCY"/                                   | 750     |
| 8                                         | Medline  | *"ANTIPHOSPHOLIPID SYNDROME"/                              | 6568    |
| 9                                         | Medline  | *"LUPUS COAGULATION INHIBITOR"/                            | 1040    |
| 10                                        | Medline  | *"ANTIBODIES, ANTICARDIOLIPIN"/                            | 1461    |
| 11                                        | Medline  | *"BETA 2-GLYCOPROTEIN I"/                                  | 568     |
| 12                                        | Medline  | ("factor V Leiden").ti,ab                                  | 3998    |
| 13                                        | Medline  | ("prothrombin gene mutation").ti,ab                        | 300     |
| 14                                        | Medline  | (4 OR 5 OR 6 OR 7 OR 8 OR 9 OR 10 OR 11 OR 12 OR 13)       | 35905   |
| 15                                        | Medline  | (3 AND 14)                                                 | 889     |
| 16                                        | Medline  | 15 [DT 1990-2020] [Languages English]                      | 760     |
| <b>Embase database – Search strategy</b>  |          |                                                            |         |
| #                                         | Database | Search term                                                | Results |
| 1.                                        | EMBASE   | exp "ABORTION, HABITUAL"/                                  | 6141    |
| 2.                                        | EMBASE   | ("recurrent miscarriage*").ti,ab                           | 3620    |
| 3.                                        | EMBASE   | (21 OR 22)                                                 | 8255    |
| 4.                                        | EMBASE   | exp THROMBOPHILIA/                                         | 13382   |
| 5.                                        | EMBASE   | ("acquired thrombophilia").ti,ab                           | 623     |
| 6.                                        | EMBASE   | *"PROTEIN C DEFICIENCY"/                                   | 954     |
| 7.                                        | EMBASE   | *"PROTEIN S DEFICIENCY"/                                   | 781     |
| 8.                                        | EMBASE   | *"ANTIPHOSPHOLIPID SYNDROME"/                              | 9102    |
| 9.                                        | EMBASE   | *"LUPUS COAGULATION INHIBITOR"/                            | 2122    |
| 10.                                       | EMBASE   | *"ANTIBODIES, ANTICARDIOLIPIN"/                            | 2548    |
| 11.                                       | EMBASE   | *"BETA 2-GLYCOPROTEIN I"/                                  | 1237    |
| 12.                                       | EMBASE   | ("factor V Leiden").ti,ab                                  | 6368    |
| 13.                                       | EMBASE   | ("prothrombin gene mutation").ti,ab                        | 578     |
| 14.                                       | EMBASE   | (24 OR 25 OR 26 OR 27 OR 28 OR 29 OR 30 OR 31 OR 32 OR 33) | 31404   |
| 15.                                       | EMBASE   | (23 AND 34)                                                | 1327    |

| 16.                                        | EMBASE   | 35 [DT 1990-2020] [English language]<br>[Humans]                 | 1059    |
|--------------------------------------------|----------|------------------------------------------------------------------|---------|
| <b>Cochrane database – Search strategy</b> |          |                                                                  |         |
| #                                          | Database | Search term                                                      | Results |
| 1.                                         | Cochrane | MeSH descriptor: [Abortion, Habitual] 1 tree(s) exploded         |         |
| 2.                                         | Cochrane | "recurrent miscarriage*"                                         |         |
| 3.                                         | Cochrane | #1 OR #2                                                         |         |
| 4.                                         | Cochrane | MeSH descriptor: [Thrombophilia] explode all trees               |         |
| 5.                                         | Cochrane | "acquired thrombophilia"                                         |         |
| 6.                                         | Cochrane | MeSH descriptor: [Protein C Deficiency] this term only           |         |
| 7.                                         | Cochrane | MeSH descriptor: [Protein S Deficiency] this term only           |         |
| 8.                                         | Cochrane | MeSH descriptor: [Antiphospholipid Syndrome] this term only      |         |
| 9.                                         | Cochrane | MeSH descriptor: [Lupus Coagulation Inhibitor] explode all trees |         |
| 10.                                        | Cochrane | MeSH descriptor: [Antibodies, Anticardiolipin] this term only    |         |
| 11.                                        | Cochrane | MeSH descriptor: [Antibodies, Anticardiolipin] explode all trees |         |
| 12.                                        | Cochrane | "factor V Leiden"                                                |         |
| 13.                                        | Cochrane | "prothrombin gene mutation*"                                     |         |
| 14.                                        | Cochrane | #4 OR #5 OR #6 OR #7 OR #8 OR #9 OR #10 OR #11 OR #12            |         |
| 15.                                        | Cochrane | #3 AND #14                                                       |         |

**Supplementary Table 2.** Meta-analysis demonstrating the summary statistics for prevalence of heterozygous Factor V Leiden (FVL) in the recurrent miscarriage and control groups with the prevalence difference (95% confidence intervals (CI) and effect size of the prevalence difference, expressed as relative risk (RR) with 95% CI.

| Author                              | Recurrent miscarriage group |                   | Control group |                    | Prevalence difference | Relative risk    |
|-------------------------------------|-----------------------------|-------------------|---------------|--------------------|-----------------------|------------------|
|                                     | Total                       | N (%;95% CI)      | Total         | N (%; 95% CI)      | % (95% CI)            | RR (95% CI)      |
| Rai <i>et al.</i> , 2001 [14]       | 904                         | 59 (6.5; 5.0-8.3) | 150           | 12 (8.0; 4.2-13.6) | -1.5 (-6.0-3.0)       | 0.82 (0.46-1.48) |
| Altintas <i>et al.</i> , 2007 [31]  | 114                         | 9 (7.9; 3.7-14.5) | 185           | 13 (7.0; 3.8-11.7) | 0.9 (-5.5-7.2)        | 1.12 (0.50-2.48) |
| Mougiou <i>et al.</i> , 2008 [32]   | 212                         | 8 (3.8; 1.6-7.3)  | 181           | 7 (3.9; 1.6-7.8)   | -0.1 (-4.0-3.8)       | 0.98 (0.37-2.55) |
| Serrano <i>et al.</i> , 2011 [33]   | 100                         | 5 (5.0; 1.6-11.3) | 100           | 5 (5.0; 1.6-11.3)  | -                     | 1.00 (0.32-3.14) |
| Farahmand <i>et al.</i> , 2015 [34] | 254                         | 11 (4.3; 2.2-7.6) | 350           | 10 (2.9; 1.4-5.2)  | 1.5 (-1.5-4.5)        | 1.52 (0.67-3.43) |
| <b>Summary statistics</b>           |                             |                   |               |                    |                       |                  |
| Fixed effects model                 | 1584                        | 92 (5.9; 4.8-7.1) | 966           | 47 (4.9; 3.6-6.3)  | 0.4 (-1.6-2.3)        | 1.03 (0.72-1.49) |
| Random effects model                | 1584                        | 92 (5.8; 4.6-7.1) | 966           | 47 (5.2; 3.3-7.5)  | 0.4 (-1.6-2.3)        | 1.02 (0.71-1.48) |
| Cochrane's Q (p value)              |                             | 4.401 (0.354)     |               | 8.414 (0.078)      | 1.135 (0.889)         | 1.456 (0.835)    |
| I <sup>2</sup> statistic (%; 95%CI) |                             | 9.1 (0 to 67.3)   |               | 52.5 (0 to 80.6)   | 0 (0 to 64.1)         | 0 (0 to 64.1)    |
| Bias (p value)                      |                             | -0.886 (0.524)    |               | 3.969 (0.256)      | -1.016 (0.542)        | 1.003 (0.465)    |

CI: confidence interval; RR: relative risk

**Supplementary Table 3.** Meta-analysis demonstrating the summary statistics for prevalence of heterozygous Prothrombin gene mutation (PGM) in the recurrent miscarriage and control groups with the prevalence difference (95% confidence intervals (CI) and effect size of the prevalence difference, expressed as relative risk (RR) with 95% CI.

| Author                              | Recurrent miscarriage group |                   | Control group |                   | Prevalence difference | Relative risk     |
|-------------------------------------|-----------------------------|-------------------|---------------|-------------------|-----------------------|-------------------|
|                                     | Total                       | n (%;95% CI)      | Total         | n (%; 95% CI)     | % (95% CI)            | RR (95% CI)       |
| Altintas <i>et al.</i> , 2007 [31]  | 114                         | 2 (1.8; 0.2-6.2)  | 185           | 3 (1.6; 0.3-4.7)  | 0.1 (-2.9- 3.2)       | 1.08 (0.22-5.33)  |
| Mougiou <i>et al.</i> , 2008 [32]   | 212                         | 8 (3.8; 1.6-7.3)  | 181           | 7 (3.9; 1.6-7.8)  | -0.1 (-4.0-3.8)       | 0.98 (0.37-2.55)  |
| Serrano <i>et al.</i> , 2011 [33]   | 100                         | 3 (3.0; 0.6-8.5)  | 100           | 1 (1.0; 0.0-5.4)  | 2.0 (-1.9-5.9)        | 3.00 (0.44-20.77) |
| Lino <i>et al.</i> , 2014 [35]      | 106                         | 3 (2.8; 0.6-8.0)  | 98            | 1 (1.0; 0.0-5.6)  | 1.8 (-2.0-5.7)        | 2.78 (0.40-19.21) |
| Farahmand <i>et al.</i> , 2015 [34] | 254                         | 13 (5.1; 2.8-8.6) | 350           | 10 (2.9; 1.4-5.2) | 2.3 (-0.9-5.4)        | 1.79 (0.81-3.94)  |
| <b>Summary statistics</b>           |                             |                   |               |                   |                       |                   |
| Fixed effects model                 | 786                         | 29 (3.9; 2.7-5.4) | 914           | 22 (2.6; 1.6-3.7) | 1.2 (-0.4-2.8)        | 1.52 (0.88-2.62)  |
| Random effects model                | 786                         | 29 (3.9; 2.7-5.4) | 914           | 22 (2.6; 1.6-3.7) | 1.2 (-0.4-2.8)        | 1.50 (0.86-2.60)  |
| Cochrane's Q (p value)              |                             | 2.548 (0.636)     |               | 3.293 (0.510)     | 1.556 (0.817)         | 1.689 (0.793)     |
| I <sup>2</sup> statistic (%; 95%CI) |                             | 0 (0 to 64.1)     |               | 0 (0 to 64.1)     | 0 (0 to 64.1)         | 0 (0 to 64.1)     |
| Bias (p value)                      |                             | -1.718 (0.613)    |               | -0.560 (0.841)    | 0.683 (0.823)         | 0.473 (0.592)     |

CI: confidence interval; RR: relative risk
